# Supplementary material
Source: publisher figshare collection journal article supplement (https://karger.figshare.com/ndownloader/files/30753136)
Supplement: Supplementary file 1 [file 30753136]

e-Table 2. Baseline characteristics according to hemoglobin group following propensity score matching (2:1)

| **Characteristic** | **Normal Hb (N=1004)** | **High Hb (N=502)** | **p-value** |
| --- | --- | --- | --- |
| Male Sex – n (%) | 948 (94.4) | 471 (93.8) | 0.725 |
| Age – mean (SD) | 55.56 (11.37) | 55.94 (10.54) | 0.529 |
| Current smoker – n (%) | 746 (74.3) | 371 (73.9) | 0.917 |
| Disease history – n (%) | | | |
| Dyslipidemia | 626 (62.5) | 329 (65.7) | 0.248 |
| Hypertension | 510 (50.9) | 249 (49.8) | 0.729 |
| Diabetes mellitus | 251 (25.0) | 146 (29.1) | 0.1 |
| Past myocardial infarction | 253 (25.2) | 145 (28.9) | 0.145 |
| Prior CABG | 47 (4.7) | 34 (6.8) | 0.113 |
| Prior PCI | 250 (24.9) | 140 (27.9) | 0.24 |
| Congestive heart failure | 25 (2.5) | 19 (3.8) | 0.215 |
| Chronic kidney disease | 44 (4.4) | 18 (3.6) | 0.551 |
| Peripheral vascular disease | 45 (4.5) | 36 (7.2) | 0.039 |
| CVA/TIA | 41.1 (4.1) | 33 (6.6) | 0.048 |
| COPD | 30 (4.2) | 21 (5.3) | 0.481 |
| Malignancy | 10 (1.7) | 11 (3.4) | 0.15 |
| Family history of CAD | 347 (36.3) | 154 (33.1) | 0.258 |
| ACS presentation – n (%) | | | 0.756 |
| STEMI | 562 (56.0) | 282 (56.2) |
| NSTEMI | 148 (14.7) | 106 (21.1) |
| Unstable angina | 294 (29.3) | 114 (22.7) |
| Laboratory tests | | | |
| HB level, median (IQR), g/dL | 14.21 (1.09) | 17 (16.7-17.5) | <0.001 |
| Troponin elevated – n (%) | 710 (84.1) | 388 (86.6) | 0.268 |
| GFR groups – n (%) | | | 0.632 |
| GFR 30-60 | 126 (12.5) | 64 (13.1) |
| GFR<30 | 12 (1.2) | 9 (1.8) |
| In-hospital procedures – n (%) | | | |
| Primary reperfusion | 432 (43.0) | 214 (42.6) | 0.927 |
| Invasive angiography | 927 (92.3) | 461 (91.8) | 0.812 |
| Multivessel CAD | 303 (36.6) | 140 (35.2) | 0.674 |
| PCI | 747 (74.4) | 357 (71.1) | 0.194 |
| CABG | 41 (4.4) | 22 (4.9) | 0.777 |
| LVEF – mean (SD) | 48.99 (7.62) | 48.26 (8.36) | 0.092 |
| GRACE score – median (IRQ) | 82 (66-100) | 87 (71-104.5) | 0.005 |

CABG – coronary artery bypass grafting; CAD – coronary artery disease; COPD – chronic obstructive pulmonary disease; CVA – cerebrovascular accident; ECG – electrocardiogram; GFR – glomerular filtration rate; GRACE – global registry of acute coronary events; LVEF – left ventricular ejection fraction; NSTEMI – non-ST segment myocardial infarction; SD – standard deviation; STEMI – ST segment elevation myocardial infarction; TIA – transient ischemic attack.
